# Supplementary material
Source: publisher figshare collection journal article supplement (https://frontiersin.figshare.com/ndownloader/files/24997115)
Supplement: Supplementary file [file 24997115]

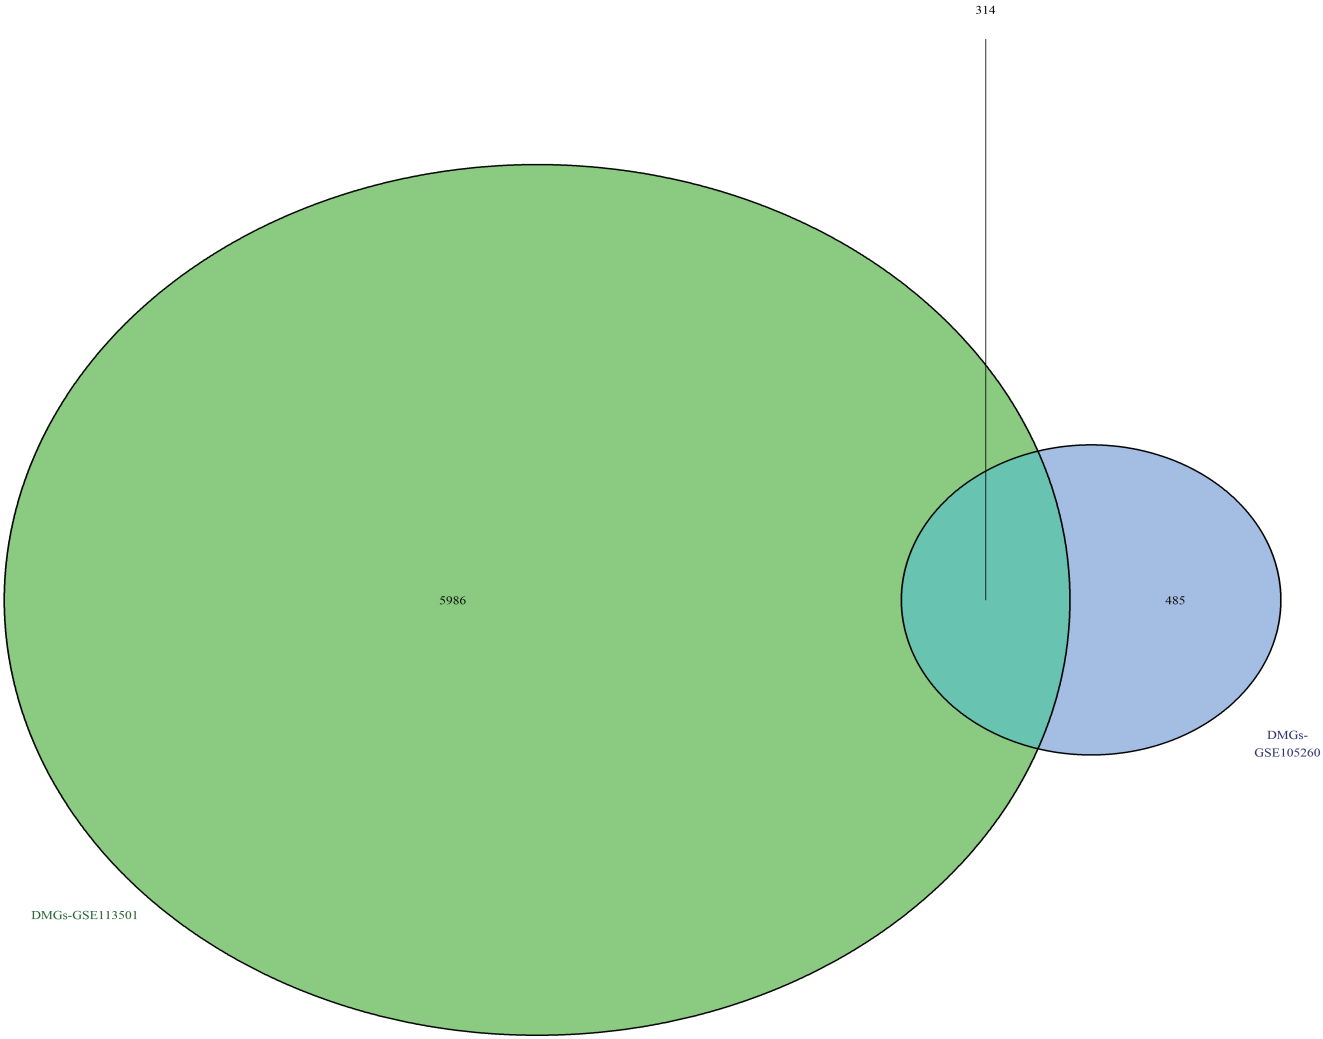

**Supplementary figure 3** Venn diagram of overlapping genes among the DMGs based on all regions from GEOdataset GSE105260 and GEOdataset GSE113501.
